# Supplementary material for: Conclusiones de la Jornada sobre Distribución Comercial
Source: Royal Society of Chemistry journal article supplement (doi:10.1039/c8cp01799a), 1997-01-01
Supplement: c8cp01799a4.pdf [file c8cp01799a4.pdf]

## Supporting Information for

# Hierarchical MoO<sub>3</sub>/SnS<sub>2</sub> Core-Shell Nanowires with Enhanced Electrochemical Performance for Lithium-Ion Batteries

*Chenli Hu,<sup>†</sup> Haibo Shu,<sup>†,\*</sup> Zihong Shen,<sup>†</sup> Tianfeng Zhao,<sup>†</sup> Pei Liang,<sup>†</sup> and Xiaoshuang Chen<sup>‡</sup>*

<sup>†</sup>College of Optical and Electronic Technology, China Jiliang University, 310018 Hangzhou,  
China

<sup>‡</sup>National Laboratory for Infrared Physics, Shanghai Institute of Technical Physics, Chinese  
Academy of Science, 200083 Shanghai, China

\*Corresponding author. Haibo Shu, Phone: +86-0571-86875622, E-mail: [shu123hb@gmail.com](mailto:shu123hb@gmail.com)

### S1. TG analysis of MoO<sub>3</sub>/SnS<sub>2</sub>

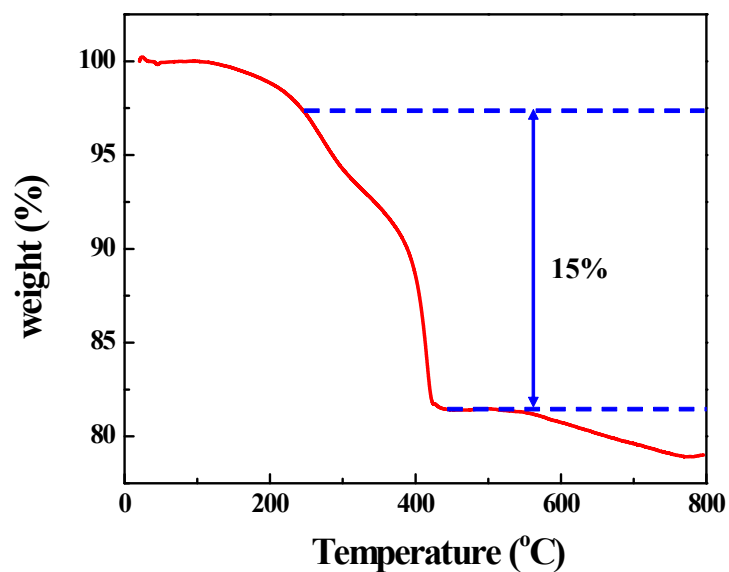

**Fig. S1** TG analysis of MoO<sub>3</sub>/SnS<sub>2</sub> composite material performed in air at a heating rate of 10 °C/min. The initial weight loss (up to ~250 °C) is due to removal of physisorbed and chemisorbed water and sulfur. Subsequent weight loss between 250 and 450 °C is mainly due to oxidation of SnS<sub>2</sub> to SnO<sub>2</sub> (a weight loss of ~15%).

## S2. CV Curves of MoO<sub>3</sub> and SnS<sub>2</sub> electrodes

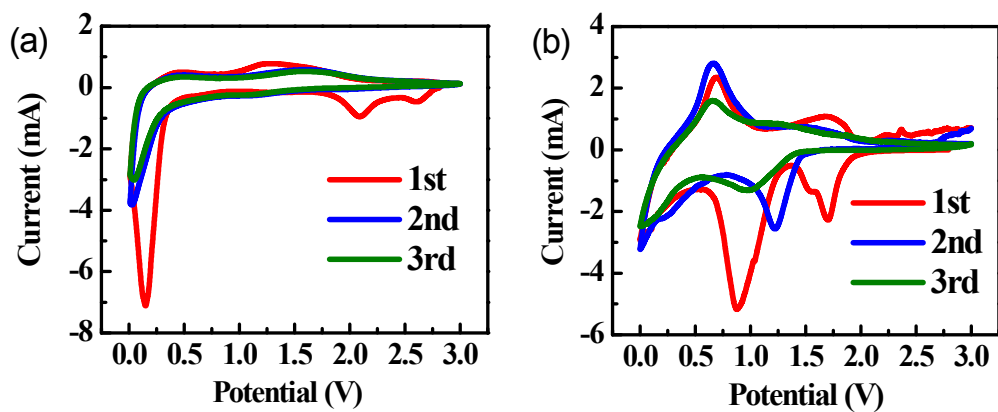

**Fig. S2** Cyclic voltammetry curves of (a) MoO<sub>3</sub> and (b) SnS<sub>2</sub> electrodes at a scan rate of 0.2 mV/s in the potential range of 0.01 and 3.0 V (vs Li/Li<sup>+</sup>).

### S3. Atomic Structure of MoO<sub>2</sub>

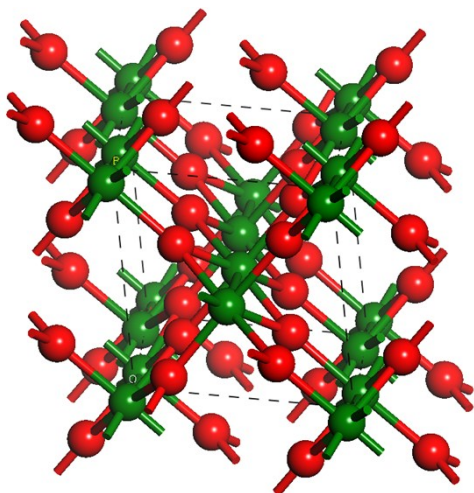

**Fig. S3** Atomic structure of MoO<sub>2</sub> ( $a = 0.5611$  nm,  $b = 0.4856$  nm,  $c = 0.5629$  nm, space group P121/c1). The green and red balls represent Mo and O atoms, respectively.

#### **S4. Movies for recording the AIMD simulation results**

**Movie S1:** The movie records the trajectories for lithiated SnS<sub>2</sub> nanosheet at 300 K within 6 ps.

**Movie S2:** The movie records the trajectories for lithiated MoO<sub>3</sub> nanosheet at 300 K within 6 ps.

**Movie S3:** The movie records the trajectories for lithiated MoO<sub>3</sub>/SnS<sub>2</sub> heterostructure at 300 K within 6 ps.

In above three movies, green, red, cyan, yellow, and purple balls represent Mo, O, Sn, S, and Li atoms, respectively.
